# Supplementary material for: Ellagic Acid Improves Antioxidant Capacity and Intestinal Barrier Function of Heat-Stressed Broilers via Regulating Gut Microbiota
Source: MDPI journal article supplement (doi:10.3390/ani12091180), 2022-05-04
Supplement: s1 [file s1]

# Ellagic Acid Improves Antioxidant Capacity and Intestinal Barrier Function of Heat-Stressed Broilers via Regulating Gut Microbiota

Tai Yang <sup>1</sup>, Bifan Liu <sup>2</sup>, Yujie Wang <sup>2</sup>, Xiangying Huang <sup>2</sup>, Zhaoming Yan <sup>2</sup>, Qian Jiang <sup>2,\*</sup> and Qinghua Chen <sup>2,\*</sup>

<sup>1</sup> Hunan Co-Innovation Center of Animal Production Safety, Changsha, 410128, China; taiyang@stu.hunau.edu.cn

<sup>2</sup> College of Animal Science and Technology, Hunan Agricultural University, Changsha 410128, China; liubifan@stu.hunau.edu.cn (B.L.); wang2441645956@163.com (Y.W.); h2307604419@163.com (X.H.); yanzmmail@163.com (Z.Y.)

\* Correspondence: jiangqian@hunau.edu.cn (Q.J.); chqh314@163.com (Q.C.); Tel.: +86-18570629932 (Q.J.); +86-15116320688 (Q.C.)

**Table S1.** Composition and nutrients of the basal diet (on air-dry basis).

| Items                        | Content             |                      |
|------------------------------|---------------------|----------------------|
|                              | 1 to 21 days of age | 21 to 42 days of age |
| Ingredient (%)               |                     |                      |
| Corn                         | 56.22               | 63.13                |
| Soybean meal                 | 32.34               | 23.54                |
| Fishmeal                     | 3.92                | 6.76                 |
| CaHPO <sub>4</sub>           | 1.46                | 0.78                 |
| Stone powder                 | 1.10                | 0.95                 |
| Soybean oil                  | 3.50                | 3.50                 |
| NaCl                         | 0.30                | 0.30                 |
| Methionine                   | 0.17                | 0.03                 |
| Premix <sup>1</sup>          | 1                   | 1                    |
| Total                        | 100                 | 100                  |
| Nutrition level <sup>2</sup> |                     |                      |
| ME (MJ/kg) <sup>3</sup>      | 12.54               | 12.96                |
| CP (%)                       | 21.50               | 20.00                |
| Lysine (%)                   | 1.20                | 1.12                 |
| Methionine (%)               | 0.5                 | 0.40                 |
| Tryptophan (%)               | 0.25                | 0.22                 |
| Threonine (%)                | 0.82                | 0.77                 |
| Cystine (%)                  | 0.33                | 0.30                 |
| Methionine +Cystine (%)      | 0.83                | 0.70                 |
| Ca (%)                       | 1                   | 0.9                  |
| Total P                      | 0.72                | 0.65                 |
| Available P (%)              | 0.45                | 0.41                 |

<sup>1</sup> Premix contains the following nutrients (per kilogram of diet): vitamin A, 10000 IU; vitamin D3, 2500 IU; vitamin B1, 3 mg; vitamin B2, 9 mg; vitamin B3(Niacin), 40 mg; vitamin B5, 15 mg; vitamin B6(Pyridoxine), 4 mg; vitamin B12, 0.03 mg; vitamin E, 30 mg; vitamin K3, 1 mg; biotin, 0.20 mg; folic acid, 1 mg; Fe (ferrous sulfate), 120 mg; Cu (copper sulfate), 10 mg; Zn (zinc sulfate), 100mg; Mn (manganese sulfate), 130 mg; I (potassium iodide), 0.7 mg; and Se (sodium selenite), 0.3 mg;

<sup>2</sup> Nutrition level is calculated according to NY/T33-2004.

<sup>3</sup> ME, metabolizable energy; and CP, crude protein.

**Table S2.** The analysis conditions for the measurements of serum biochemical parameters.

| Items                      | Detection method       | wavelength | Analysis type    |
|----------------------------|------------------------|------------|------------------|
| Urea                       | Urease-GLDH, UV Method | 340 nm     | Kinetic method   |
| glucose                    | HK Method              | 340 nm     | endpoint method  |
| total bilirubin            | VOX Method             | 450 nm     | endpoint method  |
| total protein              | Biuret Method          | 546 nm     | endpoint method  |
| total cholesterol          | CHOD-POD Method        | 500 nm     | endpoint method  |
| triglycerides              | GPO-POD Method         | 500 nm     | endpoint method  |
| aspartate aminotransferase | IFCC Method            | 340 nm     | Kinetic method   |
| alanine aminotransferase   | IFCC Method            | 340 nm     | Kinetic method   |
| alkaline phosphatase       | AMP Buffer Method      | 405 nm     | Kinetic method   |
| diamine oxidase            | Spectrophotometry      | 340 nm     | rate method      |
| Lipopolysaccharide         | Colorimetry            | 545 nm     | Enzymatic method |

**Table S3.** The sequences of primers used in this study.

| Genes          | Primers Sequences                                                 | Product size | Gene bank no.  |
|----------------|-------------------------------------------------------------------|--------------|----------------|
| $\beta$ -actin | F: 5' ATGATGATATTGCTGCGCTCGT 3'<br>R: 5' CCCATACCAACCATCACACCT 3' | 139 bp       | NM_205518.2    |
| ZO-1           | F: 5' GCCTGAATCAAACCCAGCAA 3'<br>R: 5' TATGCGGCGGTAAGGATGAT 3'    | 182 bp       | NM_001013611.2 |
| Claudin-1      | F: 5' ATGACCAGGTGAAGAAGATGC 3'<br>R: 5' TGCCCAGCCAATGAAGAG 3'     | 247 bp       | NM_001244539.1 |
| Nrf2           | F: 5' CGCTTTCTTCAGGGGTAGCA 3'<br>R: 5' AGTTCGGTGCAGAAGAGGTG 3'    | 171 bp       | NM_205117.2    |
| NQO1           | F: 5' GTTCAATGCCGTGCTCTCAC 3'<br>R: 5' CCGCTTCAATCTTCTTCTGC 3'    | 146 bp       | NM_001277620.2 |
| HO-1           | F: 5' GGTCCCGAATGAATGCCCTTG 3'<br>R: 5' ACCGTTCTCCTGGCTCTTGG 3'   | 137 bp       | NM_205344.2    |
| Gpx            | F: 5' CTGCCTCCCACTTTCTCTTG 3'<br>R: 5' TCAAAGGGGCTCCCTAGTTT 3'    | 215 bp       | NM_001277853.3 |
| CAT            | F: 5' TATCAGAGGGACGGGCCAAT 3'<br>R: 5' GCACTACTGAAACGCTGCAC 3'    | 149 bp       | NM_001031215.2 |
| MnSOD          | F: 5' TACAGCTCAGGTGTCGCTTC 3'<br>R: 5' GCCAAGGAACCAAAGTCACG 3'    | 153 bp       | NM_204211.2    |

**Notes:** ZO-1, Zonula occludens 1; Claudin-1; Nrf2, nuclear factor-E2-related factor 2; HO-1, heme oxygenase 1; NQO1, NAD(P)H:quinoneoxidoreductase; GPX1, glutathione peroxidase 1. CAT, catalase; MnSOD, manganese-containing superoxide dismutase.

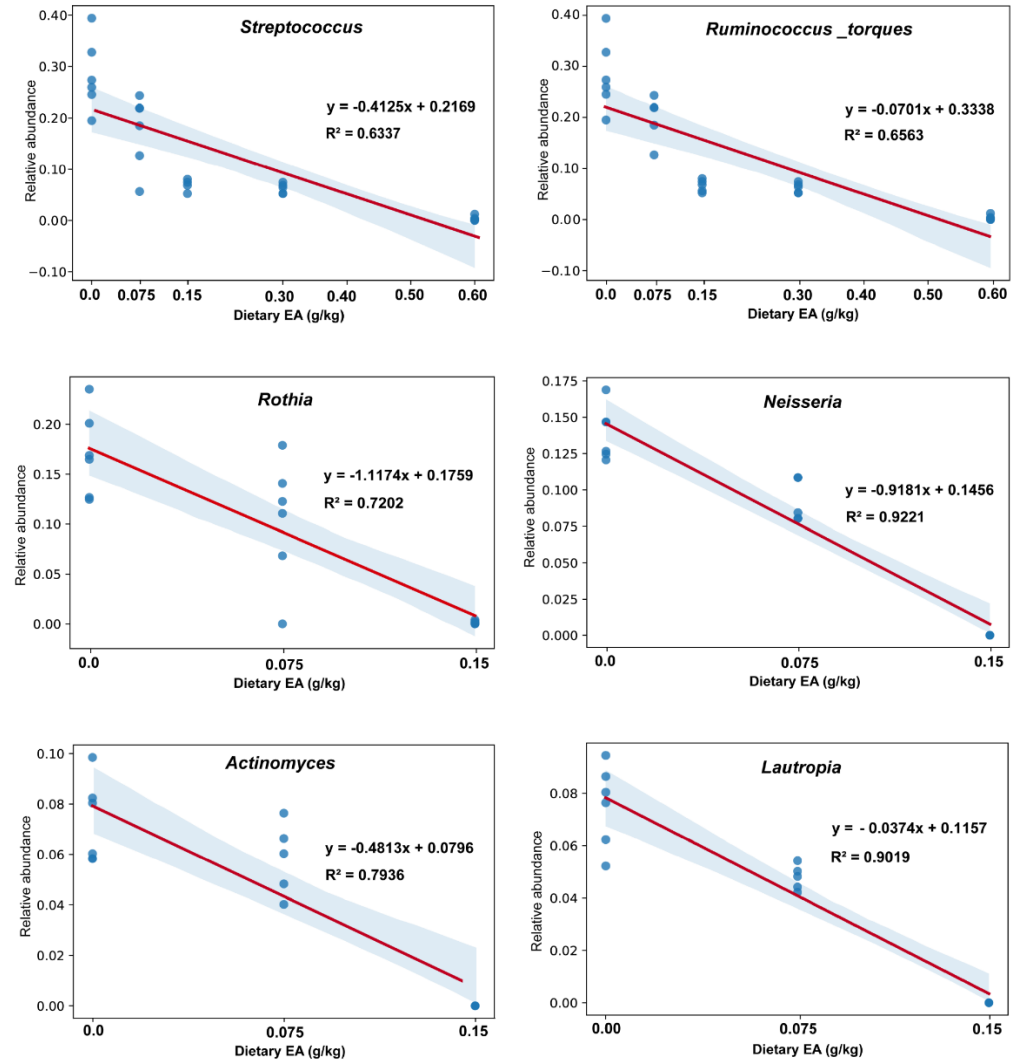

**Figure S1.** Linear-regression analysis between dietary EA dosage and cecum bacterial abundance. The broilers in the 5 experimental groups were supplemented with basal diets containing different levels of EA (0, 75, 150, 300, and 600 mg/kg) at HS temperature ( $35 \pm 2^\circ\text{C}$ ), whose specific cecum microbiota abundance and dietary EA levels are represented at y-axis and x-axis, respectively.

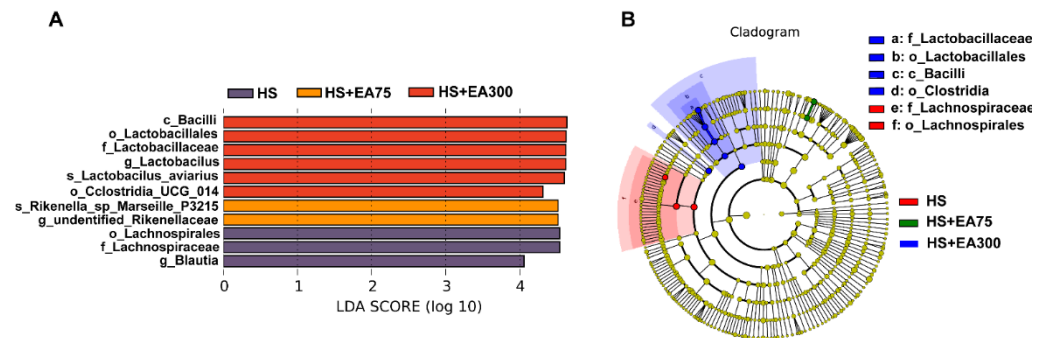

**Figure S2.** (A) LefSe analysis of composition changes of cecum microbiota in heat stress (HS) group and HS + EA (75 and 300 mg/kg) group. (B) Cladogram plot of biomarkers of HS group and HS + EA (75 and 300 mg/kg) group. The broilers in the 5 experimental groups were supplemented

with basal diets containing different levels of EA (0, 75, 150, 300, and 600 mg/kg) at HS temperature ( $35 \pm 2^\circ\text{C}$ ), which are represented as HS, HS+EA75, HS+EA150, HS+EA300, and HS+EA600, respectively.

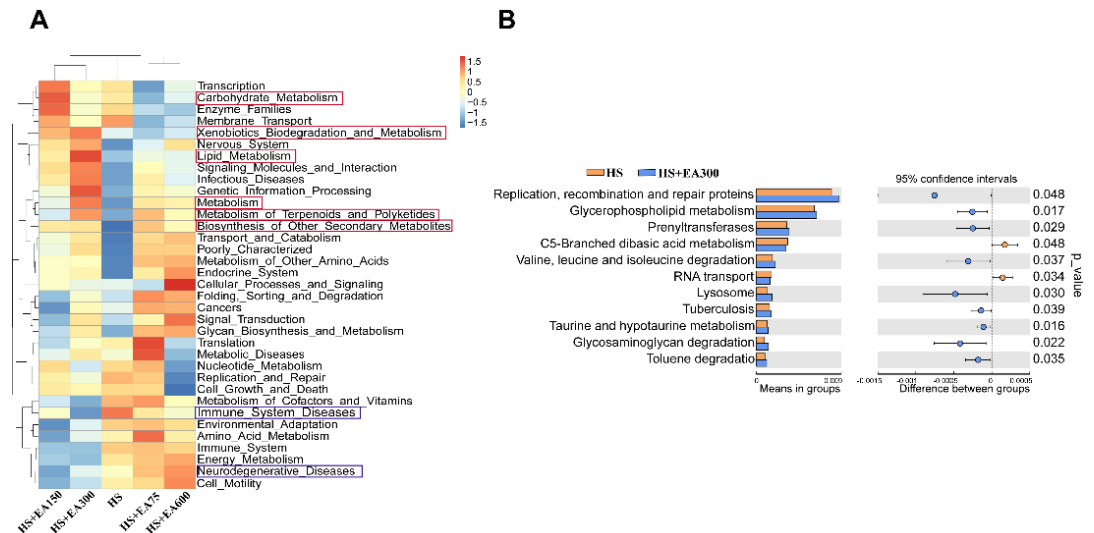

**Figure S3.** (A) Heatmap of the predicted functions of cecum microbial community based on PICRUSt analysis. (B) The Tax4Fun-based predicted functions of microbial community were compared between the heat stress (HS) group and the HS + dietary EA (300 mg/kg) group. The red box represents dietary EA supplementation increased the bacterial functions of carbohydrate metabolism, xenobiotics biodegradation and metabolism, lipid metabolism, metabolism, metabolism of terpenoids and polyketides, biosynthesis of other secondary metabolites. The purple box represents increased bacterial functions of immune system disease and neurodegeneration disease.
